# Supplementary material
Source: publisher figshare collection journal article supplement (https://springernature.figshare.com/ndownloader/files/22406361)
Supplement: Supplementary file 1 [file 22406361]

## Sheet: TablaCompletaCohorteINER_C08-04
Patient ID	Gender	Delta_CD4_year1	CD4TCdelta_W52to104	CD4TCdelta_W0to104	LeucocitosS0	Linfocitos_1000_ul_S0	Linfocitos_ul_S0	EritrocitosS0	Hb_S0	HematocritoS0	PlaquetasS0	CRP_S0	Vel_SedimS0	GlucosaS0	UreaS0	Acido_uricoS0	CreatininaS0	AlbuminaS0	ColesterolS0	TrigliceridosS0	Bili_totS0	Bili_dirS0	Bili_indS0	TGO_S0	TGP_S0	LDH__S0	Fosf__alcS0	CD4_S0	CD4porcentajeS0	CD8_S0	CD8porcentajeS0	CocCD4_CD8_S0	GlucosaS04	UreaS04	Acido_uricoS04	CreatininaS04	AlbuminaS04	Bili_totS04	Bili_dirS04	Bili_indS04	TGO_S04	TGP_S04	LDH_S04	Fosf_alcS04	LeucocitosS04	EritrocitosS04	HemoglobinaS04	HematocritoS04	PlaquetasS04
1	Hombre	178	40	218	3.9	1.2	1200	4.1	11.6	34.3	402	1.35	25	80	19	6.1	0.85	3.38	145	288	0.24	0.07	0.3	45	83	265	172	38	4	731	74	0.052	102	19	6.03	0.93	3.99	0.3	0.1	0.2	20	16	320	105	7.2	3.6	11.2	32	560
2	Hombre	204	157	361	5.6	NA	NA	4.84	14.9	45.6	184	0.29	21	103	21	6.4	0.87	4	134	359	0.23	0.1	0.13	67	127	380	117	24	1	1446	73	0.017	100	24	6.4	0.66	4.2	0.29	0.11	0.18	38	74	415	136	6.6	4.57	14.1	42.9	277
3	Hombre	115	169	284	2	NA	NA	4.9	15	45.6	148	0.109	18	89	17	6.5	1.03	4.4	113	199	0.64	0.16	0.48	134	241	337	200	5	1	589	73	0.008	85	18.7	5.2	0.8	4.52	0.4	0.2	0.2	43	45	156	195	2.2	4.51	14.6	42.7	290
4	Hombre	202	176.5	378.5	2.9	1.1	1100	4.4	13.6	39	268	0.258	NA	77	13	5.98	0.84	4.26	197	613	0.85	0.34	0.51	32	40	541	82	36	4	578	57	0.062	90	26	6.24	0.81	4.5	0.28	0	0.28	26	24	439	73	3.9	3.8	12.4	36.6	291
5	Hombre	312	262.5	574.5	1.6	NA	NA	5.2	13.9	41.4	177	0.147	26	74	27	6.62	0.8	3.97	111	375	0.43	0.16	0.27	127	169	521	132	15	3	472	79	0.032	96	25	8.02	0.77	4.11	0.3	0.13	0.17	36	47	511	101	2.9	4.8	14.3	43.1	414
6	Hombre	183	71	254	3.3	0.9	900	5.2	15.5	45.7	278	1.29	NA	88	26	6.24	0.74	4.37	156	148	0.91	0.32	0.59	38	42	350	155	3	1	637	69	0.005	102	24	4.24	0.78	3.95	0.88	0.31	0.57	79	50	867	236	1.3	3.6	11.5	33.1	241
7	Hombre	NA	NA	NA	3.2	2	2000	5.2	16.2	47	167	0.17	13	88	19	6	0.62	4.46	103	110	0.3	0.07	0.23	44	71	310	77	58	3	1514	73	0.038	89	24	4.31	0.68	4.47	0.2	0.08	0.12	29	39	335	125	3.3	4.8	15.2	43	268
8	Mujer	231	99	330	2.8	NA	NA	4.9	14.3	42.2	158	0.04	NA	93	16	4.67	0.69	3.88	104	227	0.15	0.04	0.11	52	50	323	134	110	9	847	72	0.13	93	17	3.85	0.63	4.53	0.32	0.1	0.22	26	24	355	134	3.4	4.4	13.4	38.8	327
9	Mujer	NA	NA	NA	NA	NA	NA	NA	NA	NA	NA	0.08	5	NA	NA	NA	NA	NA	NA	NA	NA	NA	NA	149	80	NA	510	113	10	842	78	0.134	NA	NA	NA	NA	NA	NA	NA	NA	NA	NA	NA	NA	NA	NA	NA	NA	NA
10	Hombre	161	43	204	3	1.4	1400	4.9	13.9	41.2	208	NA	NA	79	25	6.39	0.84	NA	NA	NA	NA	NA	NA	NA	NA	NA	NA	66	6	667	57	0.099	88	24	6.28	0.88	4.21	0.43	0.18	0.25	32	29	349	108	3.1	4.6	13.4	41	323
11	Hombre	NA	NA	NA	4.5	1.2	1200	4	12.8	38.1	336	0.834	NA	90	40	6.61	0.79	4.33	165	125	0.49	0.15	0.34	32	6	343	128	101	11	655	70	0.154	88	26	5.64	0.83	4.66	0.3	0.09	0.21	18	17	344	103	5.7	4.6	14.4	43	358
12	Hombre	177	343	520	2.6	0.6	550	4.6	14.5	43.4	262	0.404	36	78	37	5.52	0.91	3.83	178	156	0.41	0.14	0.27	33	38	561	280	6	1	346	68	0.017	86	26	5	0.84	4.51	0.4	0.13	0.27	29	29	554	327	2.3	6.6	21.8	64.1	152
13	Hombre	128	NA	NA	3.8	0.9	900	4.5	13.7	40.5	143	0.726	NA	80	22	7.48	0.93	3.88	155	422	0.41	0.12	0.29	39	34	375	123	85	10	555	66	0.153	87	18	5.16	0.93	3.74	0.14	0.06	0.08	15	11	304	103	5.3	3.8	11.8	35.5	394
14	Hombre	115	151	266	3.6	1.1	1100	4.8	14.9	44.6	308	0.515	NA	89	39	3.96	0.91	4.43	206	189	0.39	0.11	0.28	24	31	483	92	5	1	784	83	0.006	87	26	3.6	0.95	4.49	0.31	0.08	0.23	15	10	366	95	9	4.6	14.6	43.6	423
15	Hombre	283	904	1187	3.7	NA	NA	4.8	14.4	42.4	241	0.78	NA	72	32	15	0.82	4.25	183	290	0.67	0.21	0.46	55	112	400	126	35	2	966	65	0.036	97	24	4.86	0.77	4.47	0.43	0.15	0.28	31	38	461	103	4.6	4.3	13.4	40.6	473
16	Hombre	404	7	411	4	0.8	800	4.4	13.7	40	115	0.895	NA	88	30	5.09	0.81	4.19	138	101	0.47	0.12	0.35	27	21	343	90	35	4	534	60	0.066	114	26	6.04	0.78	4.68	0.33	0.1	0.23	36	39	376	82	4.1	4.4	14	41.3	165
17	Hombre	NA	NA	NA	5.7	3.1	3100	4.2	13.1	38.1	231	1.25	NA	86	23	6.5	0.84	4.03	138	130	0.24	0.06	0.18	14	15	406	71	130	11	784	66	0.166	91	26	5.17	0.86	4.5	0.29	0.09	0.2	16	9	489	68	5.6	4	13.5	38.1	260
18	Hombre	35	37	72	5.3	2.6	2570	4.3	13.5	40.1	237	0.372	NA	88	40	6.42	1.41	4.44	119	78	0.8	0.21	0.59	22	9	356	67	185	7	2033	77	0.091	100	30	4.94	1.09	4.54	0.28	0.09	0.19	25	15	302	67	4.8	4	13.3	39.4	254
19	Hombre	NA	NA	NA	2.5	NA	NA	3.4	11.6	32.8	49	1.39	NA	90	20	8.36	0.62	3.84	155	183	0	0	0	219	134	533	122	14	2	351	46	0.04	103	19	6.46	0.74	3.37	0.96	0.55	0.41	61	27	1012	86	0.8	1.8	6.3	18	62
20	Hombre	216	100	316	9.7	0.8	800	4.2	12.8	37.7	444	18	NA	71	23	3.72	0.74	3.24	141	111	0	0	0	83	103	332	229	12	2	605	79	0.02	104	17	3.36	0.79	2.66	0.39	0.15	0.24	68	31	475	185	3.3	2.7	8.4	24.4	237
21	Mujer	NA	NA	NA	3.3	1.1	1100	4.3	11.5	34.4	138	0.626	NA	86	25	4.28	0.67	4	128	147	0.29	0.09	0.2	29	21	349	90	48	4	899	70	0.053	86	34	4.11	0.76	4.69	0.35	0.09	0.26	28	20	400	107	NA	NA	NA	NA	NA
22	Hombre	227	NA	NA	3.5	1	1000	4.3	13.4	38.5	183	0.411	31	92	28	5.63	0.92	4.49	124	410	0.36	0.15	0.21	27	42	286	147	7	1	824	73	0.008	87	24	6.26	0.89	4.47	0.39	0.16	0.23	29	35	350	127	2.5	3.8	12	35.7	277
23	Hombre	146	-15	131	5	1.9	1900	4.1	12	35.7	162	0.308	NA	79	29	7.31	0.86	3.97	104	190	0.31	0.07	0.24	36	17	325	173	48	3	1164	82	0.041	88	21	5.9	0.88	4.47	0.28	0.08	0.2	27	13	325	143	4.3	3.7	11.5	34.2	290
24	Hombre	59	59	118	4.3	2	2000	5.3	14.7	43.4	87	3.41	13	94	16	5.63	0.9	3.53	80	107	1.04	0.13	0.91	29	20	360	106	172	11	1192	75	0.144	91	24	4.46	0.75	3.88	0.34	0.13	0.21	25	19	370	115	4.1	4.2	12.2	36	132
25	Hombre	167	-7	160	4.1	0.9	900	4.6	14.6	42.1	173	0.266	30	60	28	6.4	0.68	4.38	173	188	0.52	0.15	0.37	30	15	760	62	9	1	532	60	0.017	NA	NA	NA	NA	NA	NA	NA	NA	NA	NA	NA	NA	NA	NA	NA	NA	NA
26	Hombre	508	56	564	1.6	0.2	200	4	11.9	34.9	144	3.95	28	76	39	7.85	0.96	3.85	95	97	0.38	0.15	0.23	30	28	279	120	16	8	52	24	0.308	87	35	7.44	0.85	3.94	0.45	0.13	0.32	19	20	296	121	4	3.7	11.1	33	414
27	Hombre	200	125	325	8.2	3.9	3900	5.1	14.7	43.3	126	0.26	NA	87	32	5.37	0.82	4.52	144	93	0.44	0.11	0.33	27	24	366	93	241	7	1360	41	0.177	88	30	4.58	0.88	4.5	0.44	0.13	0.31	23	22	323	92	5.7	4.4	13.3	38.6	228
28	Hombre	184	68	252	3.2	1.8	1800	4.7	13	37.8	141	0.452	27	83	51	7.65	1.28	4.63	110	125	0.92	0.23	0.69	28	28	312	84	73	4	1256	70	0.058	84	36	6.02	1.03	4.43	0.43	0.17	0.26	22	20	486	80	5.5	4.3	12.3	35.8	266
29	Hombre	NA	NA	NA	4.4	1.6	1600	4.8	14.5	42	198	0.716	NA	89	31	9.12	0.94	4.33	199	112	0.63	0.16	0.47	24	26	393	101	284	20	756	52	0.376	NA	NA	NA	NA	NA	NA	NA	NA	NA	NA	NA	NA	NA	NA	NA	NA	NA
30	Hombre	280	126	406	3.6	1.3	1300	3.6	13.4	35	224	NA	NA	73	16	10.25	0.91	3.9	145	204	0.16	NA	NA	45	26	473	138	76	7	911	82	0.083	93	17	10.87	0.7	3.52	0.46	0.19	0.27	56	26	772	NA	3.3	3.6	10.8	32.4	273
31	Hombre	137	273	410	1.1	NA	NA	3.6	11.1	32.5	267	0.127	32	95	20	5.58	0.86	3.94	122	85	0.48	0.16	0.32	45	41	242	79	16	5	157	44	0.102	94	32	4.53	1.1	3.77	0.22	0.06	0.16	51	57	331	153	3.7	4.1	12.9	39.2	371
32	Hombre	145	122	267	5.5	3	3040	5.35	14.4	42.4	142	0.01	4	80	32	6.7	0.89	4.2	152	593	0.29	0.13	0.16	46	50	383	95	19	1	2673	93	0.007	99	30	5.23	0.86	4.36	0.53	0.22	0.31	52	62	510	105	8.6	4	11.5	33.2	231
33	Hombre	NA	NA	NA	2.6	NA	NA	4.3	13.6	38.9	176	0.402	16	78	24	6.7	1.11	4.27	127	124	0.37	0.14	0.23	53	65	300	141	69	8	579	68	0.119	88	24	5.82	0.81	4.3	0.55	0.17	0.38	31	29	304	109	2.4	4	13.1	37.9	203
34	Mujer	NA	NA	NA	5	1.9	1900	5.8	10.6	34.3	265	0.202	6	102	35	5.38	0.77	4.21	140	72	0.98	0.25	0.73	25	23	374	NA	326	15	1473	66	0.221	104	42	3.73	0.65	4.15	0.53	0.17	0.36	24	21	341	98	3.5	5.4	10.5	32.9	350
35	Mujer	190	163	353	2.5	0.7	700	3.7	11.5	33.2	243	0.64	22	76	23	4.49	0.91	4.11	94	172	0.5	0.14	0.36	82	36	400	NA	3	1	388	65	0.008	80	16	5.7	0.7	4.16	0.42	0.18	0.24	52	24	534	122	1.7	3.3	10.8	30.4	352
36	Hombre	NA	NA	NA	3.5	NA	NA	4	11.7	34.5	439	1.24	NA	81	20	4.68	0.51	3.42	71	74	0.46	NA	NA	20	16	455	NA	21	1	786	53	0.027	89	15	3.21	0.53	3.12	0.37	0.13	0.24	41	39	597	190	5	3.9	11.7	35.6	591
37	Mujer	NA	NA	NA	5.2	2.3	2300	4.3	13.7	39.4	338	0.166	NA	93	25	6	0.65	4.73	175	486	0.21	NA	NA	31	35	283	NA	296	12	1235	51	0.24	93	28	4.79	0.69	4.84	0.3	0.16	0.14	30	41	298	104	5.5	4	13.3	38.2	481
38	Hombre	NA	NA	NA	3.4	NA	NA	4.5	13.6	39.2	261	1.08	NA	81	41	4.62	1.15	3.7	206	163	0.31	0.08	0.23	38	72	604	97	37	5	525	73	0.07	87	47	6.71	0.89	4.18	0.35	0.09	0.26	25	30	534	73	3.7	4.9	15.5	44.8	380
39	Mujer	161	160	321	5.6	0.4	400	3.7	8.6	27.3	406	0.523	NA	107	29	4.11	0.54	3.37	115	277	0.21	0.12	0.09	66	47	465	305	5	1	307	86	0.016	106	26	4.53	0.4	3.51	0.19	0.08	0.11	125	101	651	851	3.2	3.4	8.1	25	474
40	Hombre	205	139	344	3.4	NA	NA	4.8	13.4	40.2	208	0.561	30	84	20	5.38	0.92	3.52	180	236	0.22	0.05	0.17	37	75	388	116	38	2	1628	87	0.023	86	26	6.38	0.89	4.58	0.15	0.06	0.09	25	37	365	80	4	4.7	13.8	39.8	187
41	Hombre	NA	NA	NA	4.5	1.5	1500	5.1	14.7	43.6	217	1.05	4	96	20	7	0.84	4.68	141	127	0.61	0.19	0.42	36	45	335	117	87	6	1162	79	0.075	97	19	5.62	0.81	4.86	0.32	0.08	0.24	39	50	341	107	3.8	5.1	15.1	44.1	265
42	Hombre	NA	NA	NA	2.6	0.7	700	4.3	12.2	36.1	103	0.589	NA	86	28	5.3	0.86	4.22	133	309	0.38	0.11	0.27	43	69	300	109	53	9	333	56	0.159	NA	NA	NA	NA	NA	NA	NA	NA	NA	NA	NA	NA	NA	NA	NA	NA	NA
43	Hombre	45	239	284	7.8	NA	NA	6	18.5	53.8	342	5.38	NA	106	44	9.55	2.27	5.57	124	135	0.66	0.25	0.41	89	65	537	128	165	8	1272	62	0.13	91	19	4.53	0.67	3.97	0.19	0.08	0.11	45	58	461	114	3.5	4.6	13.9	42.2	430
44	Hombre	355	671	1026	5.4	3.2	3200	4.7	14.5	42	200	0.243	NA	85	31	9.41	1.09	4.33	69	144	0.58	0.16	0.42	30	31	322	72	197	7	2360	81	0.083	89	18	7.6	1.03	3.81	NA	NA	NA	29	NA	348	66	6.2	4.8	14.1	43.2	254
45	Hombre	135	112	247	5.4	0.7	700	5.4	15.7	47.9	199	0.072	NA	99	27	6.88	0.9	4.91	94	119	0.58	0.22	0.36	71	108	320	115	38	6	446	74	0.085	77	22	5.71	0.83	4.22	0.39	0.11	0.28	39	52	303	95	2.5	4.89	14.3	43.3	210
46	Hombre	204	NA	NA	3.3	0.9	900	4.5	14.3	42.9	131	0.514	NA	80	19	6.24	0.66	4.51	125	172	0.55	0.21	0.34	25	32	338	120	53	6	573	66	0.092	80	19	6.24	0.66	4.51	0.55	0.21	0.34	25	32	338	120	3.3	4.5	14.3	42.9	131
47	Hombre	NA	NA	NA	3.9	1.4	1400	4.6	13.9	41.7	179	0.207	NA	73	31	7.67	1.01	4.16	112	142	0.67	0.23	0.44	36	31	396	162	162	13	725	60	0.223	NA	NA	NA	NA	NA	NA	NA	NA	NA	NA	NA	NA	NA	NA	NA	NA	NA
48	Hombre	247	137	384	2.8	NA	NA	3.8	11.2	33.9	163	0.678	NA	86	26	4.56	1.11	4.39	110	302	0.6	0.2	0.4	30	27	324	108	43	5	667	76	0.064	78	29	8.18	1.04	4.48	1	0.29	0.71	20	21	284	110	5.3	4	12.3	37.3	265
49	Hombre	272	NA	NA	2.5	NA	NA	4.9	14.7	44.5	142	0.931	NA	84	21	9.6	0.77	4.52	131	153	0.67	0.28	0.39	23	18	441	85	32	5	472	69	0.068	96	28	7.24	0.66	3.98	0.36	0.12	0.24	20	21	379	78	5.6	4	12.3	36.8	288
50	Hombre	103	12	115	4.1	1.3	1300	5.1	15.7	46.5	226	0.043	20	94	36	5.12	1.03	4.44	162	364	0.56	0.15	0.41	35	39	340	102	124	11	741	67	0.167	100	43	4.23	1.19	4.93	0.44	0.14	0.3	72	131	402	165	3.4	5.2	16	47.2	195
51	Hombre	NA	NA	NA	5.2	1.9	1900	4.7	13.4	40.1	352	0.737	NA	79	23	7.57	0.63	4.03	96	89	0.44	0.14	0.3	62	77	256	110	25	1	996	49	0.025	82	24	5.51	0.59	4.38	0.25	0.07	0.18	27	21	269	131	6.1	4.7	13.4	39.8	398
52	Hombre	NA	NA	NA	2.9	0.5	500	4.3	11.9	37.2	228	2.45	26	NA	NA	NA	NA	NA	NA	NA	NA	NA	NA	NA	NA	NA	NA	3	1	263	57	0.011	NA	NA	NA	NA	NA	NA	NA	NA	NA	NA	NA	NA	6.3	4.43	12.7	37.7	335
53	Hombre	NA	NA	NA	2.9	0.7	700	3.6	10.4	31.4	145	0.462	34	94	23	13.81	0.89	3.76	133	86	0.53	0.18	0.35	20	13	247	44	27	5	452	79	0.06	NA	NA	NA	NA	NA	NA	NA	NA	NA	NA	NA	NA	NA	NA	NA	NA	NA
54	Hombre	NA	NA	NA	NA	NA	NA	NA	NA	NA	NA	NA	NA	NA	NA	NA	NA	NA	NA	NA	NA	NA	NA	NA	NA	NA	NA	41	4	717	71	0.057	NA	NA	NA	NA	NA	NA	NA	NA	NA	NA	NA	NA	NA	NA	NA	NA	NA
55	Hombre	114	294	408	3.5	2	2000	4.3	13.9	39.8	215	0.062	30	88	NA	6.82	0.69	NA	163	298	0.43	0.06	0.37	49	58	295	161	94	5	1383	74	0.068	91	36	6.29	0.72	4.47	0.21	0.06	0.15	59	64	539	178	3	4.5	14.7	41.9	213
56	Hombre	377	69	446	2.9	1.4	1400	4.3	14.4	41.7	255	0.233	NA	82	18	8.24	0.91	4.26	139	339	0.41	0.13	0.28	33	41	462	90	25	2	461	34	0.054	98	18	7.19	1.06	4.3	0.47	0.15	0.32	23	30	438	98	3.5	4.8	16.1	47.2	316
57	Hombre	-34	222	188	2.7	0.9	890	4.76	14.5	42.3	176	0.461	16	85	18	5.13	0.8	4.25	108	460	0.14	0.07	0.07	29	23	272	217	165	9	1325	69	0.125	96	24	4.73	0.95	4.59	0.22	0.06	0.16	23	28	267	116	3.4	4.8	14.8	43.4	227
58	Hombre	173	225	398	4.4	1.8	1800	5.5	16.5	48.6	251	0.077	4	81	17	7.13	0.76	4.69	88	123	0.3	0.12	0.18	86	116	407	193	55	3	1032	65	0.053	105	19	5.18	0.59	4.59	0.33	0.1	0.23	46	124	349	120	6.2	4.6	14.2	42.1	340
59	Hombre	177	177	354	3.8	1.4	1400	4.3	12.9	38.3	259	0.468	24	91	29	5.04	0.79	4.28	115	153	0.27	0.1	0.17	30	26	268	120	83	7	867	69	0.096	87	36	5.32	0.96	4.63	0.41	0.12	0.29	32	35	384	89	3.8	4.5	14.7	44.2	222
60	Hombre	104	92	196	3.4	0.5	500	4.8	NA	40.3	305	NA	32	106	33	5.5	0.78	4.1	228	1520	NA	NA	NA	35	34	484	176	33	13	89	35	0.371	76	17	5.13	0.97	4.36	0.29	0.09	0.2	28	33	368	204	4.3	4.6	13.7	40	360
61	Hombre	94	29	123	3	0.6	600	4.2	13.9	40.2	9	0.323	34	86	25	6.62	0.75	3.84	133	132	0.48	0.16	0.32	32	25	428	131	42	8	265	49	0.158	81	18	5.42	0.69	3.88	0.22	0.1	0.12	29	25	375	136	2.6	4.1	14	39.5	234
62	Hombre	228	-82	146	4.2	1.9	1900	4.9	11.2	34.8	380	0.344	NA	101	25	5.63	0.75	3.58	124	124	0.2	0.06	0.14	37	21	398	197	96	5	1551	79	0.062	87	19	5.51	0.76	3.19	0.2	0.05	0.15	26	11	349	192	5.6	4.84	11.5	35.4	525
63	Hombre	NA	NA	NA	6.6	0.7	700	4.5	11.6	35.5	237	NA	24	84	18	3.24	0.55	2.88	124	99	0.65	0.18	0.22	31	22	575	102	6	1	389	68	0.015	NA	NA	NA	NA	NA	NA	NA	NA	NA	NA	NA	NA	NA	NA	NA	NA	NA
64	Hombre	300	58	358	3.1	0.5	500	4.5	14.1	41.2	211	0.459	28	91	28	7.23	0.84	4.47	99	189	0.56	0.23	0.33	45	67	366	89	9	2	361	68	0.025	88	28	7.33	0.81	4.28	0.24	0.11	0.13	20	29	318	72	4.2	4.2	13.7	39.8	300
65	Hombre	226	-1	225	4.5	2.4	2400	5.6	17.2	49.8	224	0.062	NA	79	21	7.68	0.89	4.52	119	102	0.65	0.26	0.39	83	101	482	83	90	5	1084	55	0.083	82	15	6.96	0.77	4.31	0.5	0.16	0.34	66	65	533	81	NA	NA	NA	NA	NA
66	Hombre	155	52	207	3.3	1.5	1500	5.5	16.2	47.2	242	NA	14	72	29	5.31	0.78	4.54	105	145	0.64	0.15	0.49	15	13	231	107	275	15	1053	58	0.261	70	33	5.98	0.77	4.62	0.6	0.18	0.42	18	12	226	114	3.9	5.4	15.5	50.9	217
67	Hombre	100	38	138	5.7	1.4	1400	5.4	17.5	49.2	256	0.534	3	87	17	6.44	0.68	4.39	151	114	0.51	0.13	0.38	30	48	279	104	142	10	916	64	0.155	80	24	6.88	0.81	4.41	0.79	0.29	0.5	32	38	259	112	5.5	4.8	16.1	47.4	270
68	Hombre	63	NA	NA	3.3	1.2	1200	4.8	14.6	42.3	178	1.18	42	86	25	7.15	1.03	3.42	108	255	0.43	0.13	0.3	54	44	350	110	127	7	1242	72	0.102	82	53	6.76	1.03	3.48	0.26	0.06	0.2	35	31	316	115	4	5	15.1	43.8	154
69	Hombre	2	32	34	6.2	1.9	1900	5.2	15.5	46.3	321	0.733	NA	76	24	5.58	0.83	4.43	151	247	NA	0.06	NA	38	66	280	197	132	7	1305	73	0.101	90	28	NA	0.78	4.53	0.38	0.12	0.26	31	56	243	178	4.1	5.2	17.1	50.6	167
70	Hombre	174	NA	NA	2.6	1.2	1200	4.9	14.5	42.3	341	0.227	26	79	15	3.13	0.84	4.16	155	163	0.52	0.14	0.38	147	143	380	97	72	5	1199	86	0.06	87	21	4.57	0.63	4.5	0.36	0.11	0.25	43	44	295	95	3	5.1	15.2	45.7	312
71	Hombre	246	NA	NA	2.1	0.5	500	3.6	11.5	33	238	0.143	24	77	28	4.04	0.67	4.17	138	129	0.27	0.11	0.16	323	362	512	151	35	7	299	63	0.117	81	23	4.23	0.79	4.5	0.29	0.09	0.2	25	31	371	120	3.5	4.2	13.5	40.1	333
72	Hombre	235	NA	NA	2.9	NA	NA	3.2	10.6	30.1	183	0.138	26	76	40	8.11	0.88	4.23	115	236	0.49	0.25	0.24	78	92	369	74	31	4	539	68	0.058	78	40	8.25	0.96	4.44	0.38	0.17	0.21	6	77	383	58	6.8	3.7	12.2	35.6	NA
73	Hombre	145.3	NA	NA	2.3	1	1000	NA	12.2	36.2	288	NA	30	76	23	5.41	0.86	4.12	137	208	0.22	0.07	0.15	NA	23	334	121	17	1.5	873	77.2	0.02	82	33	5.42	0.93	5.01	2.06	0.44	1.62	31	29	336	119	3.4	4.8	13.8	40.7	168
74	Hombre	144	NA	NA	4.3	2.2	2200	NA	15.8	46.8	183	NA	26	94	26	6.16	0.89	4.46	86	101	0.47	0.13	0.34	NA	50	308	112	124	6	1630	74	0.08	94	29	4.86	0.87	4.59	0.31	0.24	0.24	47	53	309	137	5	5.2	16.1	48	188
75	Hombre	NA	NA	NA	3.6	1.5	1500	5.6	16.5	48	248	0.912	12	87	32	5.77	1.3	4.44	168	89	0.52	0.17	0.35	38	51	352	83	112	6.9	1081	66.5	0.1	86	33	5.27	1.04	4.31	0.95	0.24	0.71	18	23	387	69	4.4	5	15	44.6	373
76	Hombre	245	NA	NA	4	2.2	2200	5.4	15.9	45.6	153	0.142	16	96	19	5.28	0.9	4.02	158	592	0.45	0.15	0.3	46	55	392	148	105	4	1874	78	0.06	100	19	4.71	0.97	4.48	0.29	0.08	0.21	35	38	350	110	3.9	5.5	16.2	47	181
77	Hombre	NA	NA	NA	5.7	2.6	2600	5.5	15.9	47.4	243	NA	18	88	27	4.94	0.91	4.3	177	1020	0.08	0.01	0.07	32	51	418	140	169	6	1626	59	0.1	91	27	4.21	1.02	4.44	0.25	0.1	0.15	34	37	388	164	10.3	5.7	16.3	48.6	379
78	Hombre	NA	NA	NA	3.9	NA	NA	3.9	11.9	35.5	417	1.2	34	79	26	6.12	0.63	4.24	93	154	0.83	0.29	0.54	58	72	456	117	18	1.2	1107	72.1	0.02	88	25	4.43	0.8	4.28	0.34	0.09	0.25	72	87	548	155	5.7	3.9	13.2	39.4	458
79	Hombre	NA	NA	NA	2.2	0.9	900	4.5	13.1	39.2	147	0.728	19	86	20	5.25	0.71	4.15	123	216	0.36	0.12	0.24	31	31	374	100	42	5	577	70	0.073	92	27	5.63	0.81	4.65	0.31	0.08	0.23	26	28	325	89	3.6	4.6	14.1	41.3	222
80	Hombre	344.6	NA	NA	5.2	1.5	1500	5.5	15.7	47.1	121	1.87	2	83	29	4.43	0.77	4.01	126	60	0.41	0.16	0.25	26	17	481	156	222	13.6	870	53.1	0.26	86	22	3.02	0.74	3.79	0.43	0.15	0.28	28	28	480	177	7.5	5.5	15.3	46.4	226
81	Hombre	NA	NA	NA	3.4	1.5	1500	4	11.4	33.9	7	0.137	16	100	21	5.96	0.86	3.97	127	188	0.36	0.09	0.27	28	17	462	71	87	6	1199	81	0.07	89	30	7.15	0.82	3.95	0.17	0.09	0.08	32	20	579	149	4.9	3	8.4	25.9	11
82	Hombre	NA	NA	NA	3.1	1.2	1240	4.2	11.7	34.9	102	0.72	36	87	24	6.48	0.7	3.6	100	73	0.43	0.13	0.3	39	54	417	106	61	5	897	80	0.07	80	31	7.09	0.76	3.96	0.11	0.05	0.06	36	54	278	82	5.4	4.6	13.3	39.9	165
83	Hombre	345	NA	NA	2.5	0.7	700	4.9	14.3	43	356	0.406	23	94	13	3.82	0.76	4.47	128	107	0.43	0.17	0.26	43	67	321	194	58	6	527	56	0.11	86	29	4.64	0.81	4.68	0.28	0.12	0.16	92	205	549	481	5.5	4.3	12.6	37.4	252
84	Hombre	287	NA	NA	3.4	1.4	1400	5	15.2	45.4	218	0.06	20	89	25	4.33	0.72	4.99	180	204	0.56	0.13	0.43	65	80	441	94	47	3	901	62	0.05	84	22	4.66	0.84	4.86	0.4	0.11	0.29	37	50	377	94	8.3	4.8	15	44	217
85	Hombre	NA	NA	NA	5.1	2.2	2200	4.8	14.9	43.5	298	0.842	NA	85	25	5.93	0.75	4.26	127	92	0.52	0.13	0.39	33	25	582	110	19	1	1154	54	0.02	82	35	5.19	0.7	4.26	0.37	0.1	0.27	30	22	618	93	5.6	4.6	14.7	43.9	229
86	Hombre	NA	NA	NA	1.6	0.5	500	4.4	13.4	39.1	362	0.601	23	74	27	6.23	0.9	4.38	156	109	0.58	0.58	0.44	50	48	401	88	6	2	98	25	0.06	88	30	4.93	0.93	4.51	0.37	0.09	0.28	36	31	459	131	1.4	4.3	12.8	37.7	371
87	Hombre	196	NA	NA	9.6	2.3	2300	4.6	14.7	43.3	195	2.51	27	96	22	5.43	0.73	3.89	136	255	1.07	0.27	0.8	45	41	528	158	67	3	1165	55	0.06	101	18	2.39	0.61	3.22	0.69	0.26	0.43	93	105	556	1010	8.7	4.1	13.4	40.1	333
88	Hombre	205	NA	NA	3.7	1.6	1600	4.7	14.3	42.6	228	1.65	19	80	30	7.45	0.87	3.81	110	86	0.32	0.11	0.21	37	50	332	114	195	12	948	57	0.21	87	25	6.21	0.77	3.95	0.3	0.1	0.2	29	34	343	165	4.5	4.9	14.9	44	266
89	Hombre	NA	NA	NA	3	1.4	1400	6.2	15.7	46.7	173	1.17	10	87	27	5.92	0.82	4.28	175	182	0.35	0.08	0.27	88	115	340	182	96	6.2	1038	67.1	0.09	82	29	7.79	1.08	4.53	1.62	0.38	1.24	27	23	300	163	5.4	6.1	15.7	45.8	236
90	Hombre	377.9	NA	NA	3.2	1.1	1100	4.1	11.8	36	197	1.09	30	83	25	6.14	0.98	3.88	140	133	1.01	0.24	0.77	28	19	412	93	83	7.1	748	63.7	0.11	98	20	5.05	0.91	4.03	0.32	0.08	0.24	24	29	367	101	3.7	4	12.4	37.02	334
91	Hombre	NA	NA	NA	6.8	2.1	2100	4.4	11.8	35.7	249	3.67	21	84	20	5.3	0.71	3.87	137	107	0.45	0.17	0.28	23	14	442	116	13	0.7	1335	74.5	0.01	NA	NA	NA	NA	NA	NA	NA	NA	NA	NA	NA	NA	NA	NA	NA	NA	NA
92	Hombre	309	NA	NA	2.3	0.4	400	4.7	14.7	43.8	159	0.553	34	92	31	6.95	0.75	NA	91	NA	NA	NA	NA	NA	NA	NA	NA	34	10.5	129	39.8	0.26	86	28	5.66	0.83	4.34	0.25	0.11	0.14	24	31	298	107	3.9	5	15.8	46	160
93	Hombre	NA	NA	NA	2.8	1	1000	4.7	14.8	43.8	153	1.64	30	88	18	7.17	0.82	4.27	110	106	0.65	0.2	0.45	61	72	444	111	100	11.6	499	58.3	0.2	75	16	6.62	0.74	4.44	0.36	0.1	0.26	52	64	403	110	4.3	4.9	15.7	45.8	197
94	Hombre	123.7	NA	NA	2.9	1.6	1600	4.2	13.3	40.9	265	2	3	75	9	7.52	0.69	3.43	145	150	0.2	0.06	0.14	27	13	402	119	73	3.1	1666	71.1	0.04	86	13	7.08	0.75	3.25	0.32	0.11	0.21	25	15	496	89	3.3	3.7	12.3	36.4	500
95	Hombre	297.1	NA	NA	3.6	0.6	600	4.6	13.8	40.4	227	0.423	NA	99	25	4.02	0.94	4.05	162	189	0.36	0.11	0.25	38	53	283	83	15	5.3	185	65.4	0.08	88	50	3.86	0.8	4.14	0.23	0.05	0.18	21	20	325	83	5.9	4.5	13.8	40.6	224
96	Hombre	241	NA	NA	4.1	1.3	1300	5.1	14.7	42.8	170	0.771	12	86	22	5.84	0.43	4.73	118	164	0.05	0.04	0.01	31	54	370	96	21	1.7	711	58	0.03	92	26	5.89	0.71	4.77	0.45	0.12	0.33	42	64	412	109	4.4	5.3	15.09	45.5	191
97	Hombre	296.5	NA	NA	5.2	1.6	1600	3.7	11.8	35.4	302	1.39	30	78	31	7.64	1.06	4.09	159	214	0.29	0.08	0.21	47	43	340	154	41	2.6	1200	76.6	0.03	85	35	7.94	1.08	4.12	0.42	0.13	0.29	47	60	466	151	3.7	3.5	12.2	36	433
98	Hombre	227	NA	NA	6.6	3.2	3200	4.3	13.3	38.6	167	0.22	10	77	40	7.43	0.91	3.43	123	143	0.28	0.07	0.21	48	48	284	115	74	2.6	2334	83	0.03	79	28	8.56	0.79	3.73	0.28	0.09	0.19	31	37	318	113	5.6	4.2	13.1	38.5	203
99	Hombre	221	NA	NA	4.3	2.8	2800	4.5	13.8	40.6	144	NA	NA	92	20	7.28	0.69	3.95	123	282	0.55	0.14	0.41	43	35	325	97	268	9	2134	75	0.13	102	23	6.92	0.76	4.48	0.37	0.06	0.31	47	46	446	99	8.2	4.8	15.4	44.1	253
[truncated: 124 more columns]
